# Supplementary material for: Evolutionary plasticity of segmentation clock networks
Source: Oxford University Press journal article supplement (doi:10.1242/dev.063834), 2011-06-07
Supplement: dev063834tables1.pdf [file dev063834tables1.pdf]

Table S1. ISH probe references

| Mouse                     |                                                                                                                                                                                 |                         |
|---------------------------|---------------------------------------------------------------------------------------------------------------------------------------------------------------------------------|-------------------------|
| Gene                      | Primer sequence (5' to 3')                                                                                                                                                      | Gene reference          |
| <i>E2f8</i>               | (F) CCATCATGCCTCTTCCTGCC<br>(R) TGCAATGGGGGAGCCATAGA                                                                                                                            | NM_001013368.5          |
| <i>Egr1</i>               | (Panitz et al., 1998)                                                                                                                                                           | 6488118                 |
| <i>Gpr177</i>             | (F) CCCAAGACCCAGAGCACG<br>(R) TTCCCCGCTGTGGACACCA                                                                                                                               | NM_026582               |
| <i>Smek2</i>              | (F) CTCCATTCCCCAGTGCTA<br>(R) GCTGCTGCATTTCTTGGCTG                                                                                                                              | NM_134034.2             |
| <i>Ddx31</i>              | (F) ACGCACTCAGTCCAGATGA<br>(R) TGTCGCTGACAGGAGGACAT                                                                                                                             | NM_001033294.3          |
| <i>Lasp1</i>              | (F) GTACCCACGGAGAAGGTGA<br>(R) GGGCGGGGATAAAGAAGCAG                                                                                                                             | NM_010688.4             |
| <i>Eprs</i>               | (F) CGGGTTTCTGAGACTGTGGC<br>(R) CGGTAAAGGGTCGGGTCTCT                                                                                                                            | NM_029735.1             |
| <i>Pfk1b1</i>             | (F) ACAAGGGTGCTTCTCAGCCTTC<br>(R) GGCCAGAGTCACCTCCAATGCG                                                                                                                        | ENSMUST00000112713      |
| <i>1110067D22Rik</i>      | (F) GCCGTGGTGAACCTTGATGATGGG<br>(R) CGGTTGTGCTACGCAATTCCACG                                                                                                                     | NM_173752               |
| <i>Ier2</i>               | (F) ACCGGAGCGGAGAACGCACA<br>(R) GCAACTACGACCAGCGGCC                                                                                                                             | NM_010499               |
| <i>Tmem41b</i>            | (F) TGACCTCCTTGGGGCAGCACTT<br>(R) TGTGAGCTTTAGAGCCTGCTGAAAA                                                                                                                     | NM_153525.5             |
| <i>Shisa2</i>             | (F) CTA CTGCTGCTCCAGCGCCG<br>(R) CGGAGGCACTGGCGTCATGG                                                                                                                           | ENSMUST00000053949      |
| <i>Lfng</i>               |                                                                                                                                                                                 | Gift of A. Aulehla      |
| Chicken                   |                                                                                                                                                                                 |                         |
| Gene                      | Primer sequence (5' to 3')                                                                                                                                                      | Gene reference          |
| <i>E2F8</i>               | (F) AAAGATCTCAACCGAGCCGC<br>(R) AGGGATGGATGCCGAGTGAA                                                                                                                            | XM_420910.2             |
| <i>EGR1</i>               | (F) ATGGACGGCCACTATCCCAA<br>(R) GCCGTTTATGAGGAGGTGTC                                                                                                                            | NM_204136.6             |
| <i>GPR177</i>             | (F) TCGGCAGCGTGGCTCACAAG<br>(R) GCAGGAGGGCATTGCGTCTG                                                                                                                            | NM_001031294            |
| <i>SMEK2</i>              | (F) CGGCACA ACTGCTTGCTTA<br>(R) GGTGGCGTTCTTGAAGAGG                                                                                                                             | XM_424305.2             |
| <i>DDX31</i>              | (F) GTCCCCACATGGAAACCCAC<br>(R) GTGAGTGTGGCTGAGAGCAG                                                                                                                            | XM_425332.2             |
| <i>LASP1</i>              | (F) GCGCGTTGCGGGAAGATCGTA<br>(R) CTGGCAGCATCCCCGTGTCG                                                                                                                           | NM_001177329            |
| <i>EPRS</i>               | (F) GCAATGTTGTGCGTTGGGAG<br>(R) CGCACTCACTTCCCCACAA                                                                                                                             | NM_001006398.1          |
| <i>ID1</i>                |                                                                                                                                                                                 | ChEST265a2              |
| <i>SPRY2</i>              |                                                                                                                                                                                 | (Minowada et al., 1999) |
| <i>DACT1</i>              |                                                                                                                                                                                 | ChEST414k23             |
| <i>AXIN2</i>              |                                                                                                                                                                                 | ChEST371a17             |
| <i>T</i>                  |                                                                                                                                                                                 | Gift of Macken lab      |
| <i>LFNG</i>               |                                                                                                                                                                                 | Gift of D. Ish lab      |
| Zebrafish                 |                                                                                                                                                                                 |                         |
| Gene (probeset)           | Primer pairs for nested PCR                                                                                                                                                     | Gene reference          |
| <i>her2</i>               | (F-out) CGAGCTCTGACAGCACAT<br>(For-in) CACCAACTGTCTGCAAAGC<br>(R-inT7) TAATACGACTCACTATAGGGCATTCTATGCGTCAGGACAG<br>(R-out) CGCGTGAAGTAAAGCAATAG<br>(F-out) CATCGAGAAGCTCAAGACTC | NM_131089.1             |
| <i>her4</i>               | (For-in) CTCAAGAGTTCATCAAGCAG<br>(R-inT7) TAATACGACTCACTATAGGGCACAGCTACACTGCAATATC<br>(R-out) TGTCCATCTTCGTTTGTAGTGC                                                            | NM_131090               |
| <i>angptl7</i> (Dr.10141) | (F-out) GGGCTGACAAGCTTCAACC                                                                                                                                                     | NM_001006073.1          |

|                 |                                                    |                |
|-----------------|----------------------------------------------------|----------------|
|                 | (For-in) GTGATTCTGGCTCGGTAAC                       |                |
|                 | (R-inT7) TAATACGACTCACTATAGGGTGCATAACAAATCCTCTGG   |                |
|                 | (R-out) CTCTACCACTGAATTTCTCTG                      |                |
|                 | (F-out) CGCTGTGTAGATATTGACGAG                      |                |
| <i>fbln</i>     | (For-in) GACACGGCTGTATTAATCTGG                     | NM_131042.1    |
|                 | (R-inT7) TAATACGACTCACTATAGGGAATTCTGGATGTTTCCTTC   |                |
|                 | (R-out) GATCATCCCGTGATCCAG                         |                |
|                 | (F-out) TTTGAAAGACAAGCCAGGAC                       |                |
| <i>nrarpa</i>   | (For-in) CCTTGCCAAATAAACCTCAG                      | NM_181495.3    |
|                 | (R-inT7) TAATACGACTCACTATAGGGCCAGATCTGCTGACTTAAAC  |                |
|                 | (R-out) AAGTGCCATCTCGATTTCTC                       |                |
|                 | (F-out) CACACCCAGAGATCCAAAG                        |                |
| <i>dact2</i>    | (For-in) AAGGTAGCGATGGTAAGGAG                      | NM_001077794.1 |
|                 | (R-inT7) TAATACGACTCACTATAGGGTTTCAGGCTAAGCAAGCTGG  |                |
|                 | (R-out) GGTGGTGTGAGAAAGTACAG                       |                |
|                 | (F-out) GACTTTATTCAAGTCCCTACG                      |                |
|                 | (For-in) AATCATCAATCCACGCTTTC                      |                |
|                 | (R-inT7) TAATACGACTCACTATAGGGACACGAAGGGTCTCTCTCC   | NM_180973.2    |
|                 | (R-out) ATCTGACCGGGTGAAACTC                        |                |
| <i>sp5</i>      | (F-out) AACCTTCACCTTGAATGC                         | NM_180973.2    |
|                 | (For-in) CGTTTGTGACACTTGACTGC                      |                |
|                 | (R-inT7) TAATACGACTCACTATAGGGATGGATCTCACAGTGCTTC   |                |
|                 | (R-out) CAGACAGAGTTTCACCGTTTC                      |                |
|                 | (F-out) AGCCAGAGCTTCATCTGC                         |                |
| <i>myca</i>     | (For-in) TCAAGTCCATCATCCTCCAG                      | NM_131412.1    |
|                 | (R-inT7) TAATACGACTCACTATAGGGTTCCTGTTATTGCGACCTC   |                |
|                 | (R-out) ATGCACTCTGTCGCCTTC                         |                |
|                 | (F-out) AGAGCTCTCAAGGAATGTG                        |                |
| <i>tnfrsf19</i> | (For-in) CCAGTCGTTCAAAGAGG                         | NM_001044904.1 |
|                 | (R-inT7) TAATACGACTCACTATAGGGATCTGCACCTTCTCCTCATC  |                |
|                 | (R-out) TCATCCTTCAGTGTGAGTGG                       |                |
|                 | (F-out) GACTCTGAGCCTTGGGATG                        |                |
| <i>spry2</i>    | (For-in) TGGATCAGATCAGGACCATC                      | NM_001003842.2 |
|                 | (R-inT7) TAATACGACTCACTATAGGGCCGAGCAACCTCTATTCTC   |                |
|                 | (R-out) GAGACAGTCCCGGATAAACG                       |                |
|                 | (F-out) GTTCTTCCTTATCGCCACTG                       |                |
|                 | (For-in) CTTCTGTTCTGCTGATCG                        |                |
| <i>has2</i>     | (R-inT7) TAATACGACTCACTATAGGGCACGGAAATACTATACG     | NM_153650.2    |
|                 | (R-out) AGGTCCACATTGAGATAGCAG                      |                |
|                 | (F-out) CGCTGTCTCATTATGAAGTG                       |                |
|                 | (For-in) GTATGACATGGTTCTTGACG                      |                |
|                 | (R-inT7) TAATACGACTCACTATAGGGTTTGGTTCAGATAGGCAAGTC |                |
|                 | (R-out) CATCACAGAGACAAATCCAGC                      |                |

| Gene                                              | Probe source            | Gene reference      |
|---------------------------------------------------|-------------------------|---------------------|
| <i>rhov</i>                                       | ZFIN: cb832             | NM_001012250        |
| <i>dact1</i>                                      | ZFIN: eu31              | NM_214731           |
| <i>tbx16</i>                                      | ZFIN: cb103             | NM_131058           |
| <i>zgc:152873</i>                                 | ZFIN: cb498             | GenBank: BU808693.1 |
| <i>eprs</i>                                       | ZFIN: IMAGE:7145319     | GenBank: BC154533.1 |
| <i>si:ch211-215h6.2</i> (similar to <i>e2f8</i> ) | ZFIN: IMAGE:7149356     | GenBank: CK686622.1 |
| <i>gpr177</i>                                     | Imagenes: IRB0p991E015D | BC053246            |
| <i>dkk1</i>                                       | Gift of Heisenberg lab  |                     |
| <i>snail1</i>                                     | Gift of Heisenberg lab  |                     |

References for ISH probes or primer sequences for making PCR-based ISH probes for the mouse, chicken and zebrafish genes.

#### References

- Minowada, G., Jarvis, L. A., Chi, C. L., Neubuser, A., Sun, X., Hacohen, N., Krasnow, M. A. and Martin, G. R. (1999). Vertebrate Sprouty genes are induced by FGF signaling and can cause chondrodysplasia when overexpressed. *Development* **126**, 4465-4475.
- Panitz, F., Krain, B., Hollemann, T., Nordheim, A. and Pieler, T. (1998). The Spemann organizer-expressed zinc finger gene Xegr-1 responds to the MAP kinase/Ets-SRF signal transduction pathway. *EMBO J.* **17**, 4414-4425.
