# Supplementary material for: Evolutionary plasticity of segmentation clock networks
Source: Oxford University Press journal article supplement (doi:10.1242/dev.063834), 2011-06-07
Supplement: dev063834tables2.pdf [file dev063834tables2.pdf]

**Table S2. Secondary filtration expression thresholds for chicken and zebrafish**

| Probe set ID       | Gene          | Present call | Max intensity | PT amplitude |
|--------------------|---------------|--------------|---------------|--------------|
| <b>Chicken</b>     |               |              |               |              |
| Gga.3754.2.S1_at   | <i>HES1</i>   | 18           | 655.8         | 5.155        |
| Gga.3772.1.S1_a_at | <i>T</i>      | 18           | 9395.5        | 1.433        |
| Gga.1785.1.S1_s_at | <i>GPR177</i> | 18           | 8308.3        | 1.308        |
| Gga.3180.1.S2_a_at | <i>LFNG</i>   | 18           | 6269.8        | 9.56         |
| Gga.8363.1.S2_at   | <i>AXIN2</i>  | 18           | 3253.5        | 2.086        |
| Filtration         |               | >17          | 655.8         | 1.3          |
| <b>Zebrafish</b>   |               |              |               |              |
| Dr.1462.1.S1_at    | <i>her1</i>   | 21           | 633.3         | 5.54         |
| Dr.3696.1.S1_at    | <i>her7</i>   | 21           | 1054.5        | 12.219       |
| Dr.5372.1.S1_x_at  | <i>her4</i>   | 14           | 29.6          | 19.733       |
| Dr.1899.1.S1_at    | <i>her15</i>  | 18           | 64.8          | 11.172       |
| Dr.8086.1.S1_s_at  | <i>dlc</i>    | 21           | 1486.2        | 4.547        |
| Filtration         |               | >13          | 29            | 4.5          |

Determination of the filtration criteria based on expression values of known cyclic genes for chicken and zebrafish. Candidate cyclic genes had to be present on a defined number of microarrays (present call), they had to meet certain maximum intensity (max intensity) and peak-to-trough (PT) amplitude threshold. Present call, maximum intensity and PT amplitude are based on MAS5 analysis of the raw microarray data.

The values in red correspond to the extreme values subsequently used to filter the data.
