# Supplementary material for: Evolutionary plasticity of segmentation clock networks
Source: Oxford University Press journal article supplement (doi:10.1242/dev.063834), 2011-06-07
Supplement: dev063834tables3.pdf [file dev063834tables3.pdf]

Table S3. qPCR primers

| Gene             | Sequence (5'-3')                                                   | Primer bank ID/reference |
|------------------|--------------------------------------------------------------------|--------------------------|
| <b>Mouse</b>     |                                                                    |                          |
| $\beta$ -actin   | (F) GGCTGTATTCCCCTCCATCG<br>(R) CCAGTTGGTAACAATGCCATGT             | 6671509a1                |
| <i>Ywhaz</i>     | (F) GAAAAGTTCTTGATCCCCAATGC<br>(R) TGTGACTGGTCCACAATTCCTT          | 6756041a1                |
| <i>Gapdh</i>     | (F) CATGGCCTTCCGTGTTCTTA<br>(R) TGTCATCATACTTGGCAGGTTTCT           |                          |
| <i>Dkk1</i>      | (F) CTCATCAATTCCAACGCGATCA<br>(R) GCCCTCATAGAGAACTCCCG             | 31542557a1               |
| <i>Gpr177</i>    | (F) TGGGAAGCAGTCTAGCCTCC<br>(R) GCAGCACAAAGCCAAGTGATA              | 31560143a1               |
| <i>T(brach)</i>  | (F) GCTTCAAGGAGCTAACTAACGAG<br>(R) CCAGCAAGAAAGAGTACATGGC          | 6678203a1                |
| <i>Axin2</i>     | (F) TGA CTCTCCTTCCAGATCCCA<br>(R) TGCCCACTAGGCTGACA                | 31982733a1               |
| <i>Lfng</i>      | (F) CGAGGTGCATAGCCTCTCC<br>(R) GCGAGGGGACAGAACTTCG                 | 6678680a1                |
| <i>Dact1</i>     | (F) CAAGAAGTGCCGTTTCCAGA<br>(R) GTTCGCTTGTGCTTCGGTTTG              | 24158474a1               |
| <b>Chicken</b>   |                                                                    |                          |
| $\beta$ -actin   | (F) TGTCCACCTTCCAGCAGTGT<br>(R) AGTCCGGTTTAGAAGCATTTCG             |                          |
| <i>YWHAZ</i>     | (F) TCGAGCACAGCAGTAAAACAA<br>(R) CATGCAATGTTAGGCAAGTATCAA          |                          |
| <i>GAPDH</i>     | (F) GCTGAGAACGGGAACTTGTG<br>(R) GGGTCACGCTCCTGGAAGA                |                          |
| <i>GPR177</i>    | (F) GCTGCTCTTGGAGACATTTCG<br>(R) CGCTCGTTCTGGTCCATCAT              |                          |
| <i>T(BRACH)</i>  | (F) GGAAAGAAATGATCACAAAGACATGA<br>(R) ATAAGCCAACCTACCTAACTGCGAGTAT |                          |
| <i>AXIN2</i>     | (F) GCGCAAACGATAGTGAGATATCC<br>(R) CCATCTACACTGCTGTCTGTCATTG       |                          |
| <i>LFNG</i>      | (F) TCGAGTCTGGGAGAAAGTGGTT<br>(R) CGTCCTCACGTTACGTTAGTTG           |                          |
| <i>DACT1</i>     | (F) CGTGGAAAAAACGACAGATGAA<br>(R) GTCATAAAACCCTGAACCTGGA           |                          |
| <b>Zebrafish</b> |                                                                    |                          |
| $\beta$ actin1   | (F) TGCCCCCTCGTGCTTTTT<br>(R) TCTGTCCCATGCCAACCAT                  |                          |
| $\beta$ actin2   | (F) CGAGCTGTCTTCCCATCCA<br>(R) TCACCAACGTAGCTGTCTTTCTG             | (Tang et al., 2007)      |
| <i>ef1a</i>      | (F) CTGGAGGCCAGCTCAAACAT<br>(R)ATCAAGAAGAGTAGTACCGCTAGCATTAC       | (Tang et al., 2007)      |
| <i>rpl13</i>     | (F) CCCGTGGACCATATCACTTCA<br>(R) GCATACCTTTACAGTCTCCAGAA           |                          |
| <i>hprt1</i>     | (F) ATCAGCGAAACAGGAAAGGAG<br>(R) CTGCGGTGAGCTGCACTACT              | (Tang et al., 2007)      |
| <i>her7</i>      | (F) TCAAAATGGACAGAAAAGCTGTAAA<br>(R) ACTCCGGTTCATCCTTTCTCTTC       |                          |
| <i>sp5-like</i>  | (F) CGGACAATTTCTCCACAAT<br>(R) TCTGGAGATGAGCTGGGAGT                |                          |
| <i>rbm22</i>     | (F) CACATCTGTTCTTCTGGGTAAA<br>(R) TTTTCATGCCTGTACGGACACT           |                          |
| <i>dact1</i>     | (F) TGCCTCAGAGGGAAGGCTTA<br>(R) CAATCACACTCGGCACAACCTG             |                          |
| <i>snail1a</i>   | (F) GCTGGAATGTGAGAACGACACTT<br>(R) CATTGCTGACTGCTGGAAGCT           |                          |
| <i>myca</i>      | (F) CATTGCATTGCGTCTCGAAA<br>(R) CAGCATTGTTGACTTGTATTTAACG          |                          |
| <i>mycb</i>      | (F) TCACGCTCACGCTGACATC<br>(R) GAGTGCCGTAGCCGTGGTAA                |                          |
| <i>dusp6</i>     | (F) GTTGGGTTTACTGCTGAGGAGAA                                        |                          |

*tnfrsf19* (R) AGCCACCCTCGAGATAGAAAGC  
(F) CAGTGCGACGCTGGACAA  
(R) TCCTCCCATAGCCAAAGC

*fbln1* (F) AGTCTGCCGGTGGTCTATCAGT  
(R) TGCTGGTTGTTGTCCACACA

*prrx1* (F) GAGTTCAGGTATGGTTTCAAATCG  
(R) GCATCGCACGTTCAATTCG

*nrarpa* (F) GGGCAAGCGGACAGTTTTTA

*spry4* (R) TTATTTGGCAAGGGTAACTTTTGAC  
(F) ATATCGCAACGACCTGTTCA  
(R) GTGAGGAACCCTTGACTCCA

---
