# Supplementary material for: Evolutionary plasticity of segmentation clock networks
Source: Oxford University Press journal article supplement (doi:10.1242/dev.063834), 2011-06-07
Supplement: dev063834tables6.pdf [file dev063834tables6.pdf]

Table S6. ISH and qPCR analysis of potential zebrafish cyclic gene

|                                            | Mouse gene              | Zebrafish gene                              | On ZF chip | Expressed in post. PSM | Checked by ISH        | Checked by qPCR           | Ref. for post. PSM expression             |                                            |
|--------------------------------------------|-------------------------|---------------------------------------------|------------|------------------------|-----------------------|---------------------------|-------------------------------------------|--------------------------------------------|
| Notch                                      | <i>Hes1, Hes5, Hes7</i> | <i>her1, her2, her4, her7, her12, her15</i> | Yes        | Yes                    | Yes                   | Yes ( <i>her1, her7</i> ) | (Holley et al., 2000; Oates and Ho, 2002) |                                            |
|                                            | <i>Hey1</i>             | <i>hey1</i>                                 | Yes        | No                     | No                    | No                        | (Thisse and Thisse, 2005)                 |                                            |
|                                            | <i>Dll1, Dll3</i>       | <i>dlc</i>                                  | Yes        | Yes                    | Yes                   | No                        | (Jiang et al., 2000)                      |                                            |
|                                            | <i>Lfng</i>             | <i>lfng</i>                                 | Yes        | No                     | No                    | No                        | (Leve et al., 2001)                       |                                            |
|                                            | <i>Nrarp</i>            | <i>nrarpa</i>                               |            | Yes                    | Yes                   | Yes                       | Yes                                       | (Topczewska et al., 2003)                  |
|                                            |                         | <i>nrarpb</i>                               |            | Yes                    | No                    | No                        | No                                        |                                            |
|                                            | <i>Nkd1</i>             | <i>nkd1</i>                                 |            | No                     | Yes                   | No                        | No                                        | (Van Raay et al., 2007)                    |
|                                            | <i>nkd2</i>             |                                             | No         | No                     | No                    | No                        |                                           |                                            |
| <i>Id1</i>                                 | <i>id1</i>              |                                             | Yes        | Yes                    | No                    | No                        | (Thisse et al., 2001)                     |                                            |
| FGF                                        | <i>Spry2</i>            | <i>spry2</i>                                | Yes        | Yes                    | Yes                   | No                        | This study                                |                                            |
|                                            |                         | <i>spry4</i>                                | Yes        | Yes                    | No                    | Yes                       | (Thisse et al., 2001)                     |                                            |
|                                            | <i>Snai1</i>            | <i>snai1a</i>                               |            | Yes                    | Yes                   | No                        | Yes                                       | (Hammerschmidt and Nusslein-Volhard, 1993) |
|                                            |                         | <i>snai1b</i>                               |            | Yes                    | No                    | No                        | No                                        |                                            |
|                                            | <i>Dsp6</i>             | <i>dusp6</i>                                |            | Yes                    | Yes                   | No                        | Yes                                       | (Plaster et al., 2007)                     |
|                                            | <i>Efna1</i>            | <i>efna1</i>                                |            | No                     | No                    | No                        | No                                        | (Barrios et al., 2003)                     |
| Wnt                                        | <i>Dkk1</i>             | <i>dkk1</i>                                 | Yes        | No                     | Yes                   | No                        | This study                                |                                            |
|                                            | <i>Axin2</i>            | <i>axin2</i>                                | Yes        | Restricted to tailbud  | No                    | No                        | (Thisse et al., 2001)                     |                                            |
|                                            | <i>Dact1</i>            | <i>dact1</i>                                |            | No                     | Yes                   | Yes                       | Yes                                       | (Waxman et al., 2004)                      |
|                                            |                         | <i>dact2</i>                                |            | Yes                    | Yes                   | Yes                       | No                                        |                                            |
|                                            | <i>Sp5</i>              | <i>sp5</i>                                  |            | Yes                    | Restricted to tailbud | Yes                       | Yes                                       | (Tallafuss et al., 2001)                   |
|                                            |                         | <i>sp5l</i>                                 |            | Yes                    | Yes                   | Yes                       | Yes                                       |                                            |
|                                            | <i>c-Myc</i>            | <i>myc-a</i>                                |            | Yes                    | Yes                   | Yes                       | No                                        | This study                                 |
|                                            |                         | <i>myc-b</i>                                |            | Yes                    | Not known             | No                        | Yes                                       |                                            |
| <i>Tnfrsf19</i>                            | <i>tnfrsf19</i>         |                                             | Yes        | No                     | Yes                   | Yes                       | This study                                |                                            |
| Other                                      | <i>Has2</i>             | <i>has2</i>                                 | Yes        | Yes                    | Yes                   | No                        | This study                                |                                            |
|                                            | <i>Phlda1</i>           | ENSDARG00000039714                          | No         | No                     | No                    | No                        | (Thisse and Thisse, 2004)                 |                                            |
| Chicken gene                               | <i>gpr177</i>           |                                             | Yes        | Yes                    | Yes                   | No                        | (Jin et al., 2010), this study            |                                            |
| Genes from zebrafish cyclic candidate list | <i>fbn1</i>             |                                             | Yes        | Yes                    | Yes                   | Yes                       | (Rauch et al., 2003)                      |                                            |
|                                            | <i>tbx16</i>            |                                             | Yes        | Yes                    | Yes                   | Yes                       | (Thisse et al., 2001)                     |                                            |
|                                            | <i>rhov</i>             |                                             | Yes        | Yes                    | Yes                   | No                        | (Thisse et al., 2001)                     |                                            |
|                                            | <i>angpt17</i>          |                                             | Yes        | Yes                    | Yes                   | No                        | (Thisse and Thisse, 2004)                 |                                            |

ISH and qPCR studies of zebrafish cyclic gene candidates inferred from orthology to mouse (Dequeant et al., 2006) and chicken cyclic genes or from the zebrafish cyclic candidate list (Fig. 2).

## References

- Barrios, A., Poole, R. J., Durbin, L., Brennan, C., Holder, N. and Wilson, S. W. (2003). Eph/Ephrin signaling regulates the mesenchymal-to-epithelial transition of the paraxial mesoderm during somite morphogenesis. *Curr. Biol.* **13**, 1571-1582.
- Hammerschmidt, M. and Nusslein-Volhard, C. (1993). The expression of a zebrafish gene homologous to Drosophila snail suggests a conserved function in invertebrate and vertebrate gastrulation. *Development* **119**, 1107-1118.
- Jin, J., Morse, M., Frey, C., Petko, J. and Levenson, R. (2010). Expression of GPR177 (Wntless/Evi/Sprinter), a highly conserved Wnt-transport protein, in rat tissues, zebrafish embryos, and cultured human cells. *Dev. Dyn.* **239**, 2426-2434.
- Leve, C., Gajewski, M., Rohr, K. B. and Tautz, D. (2001). Homologues of c-hairy1 (her9) and lunatic fringe in zebrafish are expressed in the developing central nervous system, but not in the presomitic mesoderm. *Dev. Genes Evol.* **211**, 493-500.
- Li, W. and Cornell, R. A. (2007). Redundant activities of Tfap2a and Tfap2c are required for neural crest induction and development of other non-neural ectoderm derivatives in zebrafish embryos. *Dev. Biol.* **304**, 338-354.
- Liedtke, D. and Winkler, C. (2008). Midkine-b regulates cell specification at the neural plate border in zebrafish. *Dev. Dyn.* **237**, 62-74.
- Lister, J. A., Cooper, C., Nguyen, K., Modrell, M., Grant, K. and Raible, D. W. (2006). Zebrafish Foxd3 is required for development of a subset of neural crest derivatives. *Dev. Biol.* **290**, 92-104.
- Montero-Balaguer, M., Lang, M. R., Sachdev, S. W., Knappmeyer, C., Stewart, R. A., De La Guardia, A., Hatzopoulos, A. K. and Knapik, E. W. (2006). The mother superior mutation ablates foxd3 activity in neural crest progenitor cells and depletes neural crest derivatives in zebrafish. *Dev. Dyn.* **235**, 3199-3212.
- Plaster, N., Sonntag, C., Schilling, T. F. and Hammerschmidt, M. (2007). REREa/Atrophin-2 interacts with histone deacetylase and Fgf8 signaling to regulate multiple processes of zebrafish development. *Dev. Dyn.* **236**, 1891-1904.
- Rauch, G. J., Lyons, D. A., Middendorff, I., Friedlander, B., Arana, N., Reyes, T. and Talbot, W. S. (2003). Submission and curation of gene expression data. *ZFIN Direct Data Submission*, ZFIN ID: ZDB-PUB-031103-24.
- Tallafuss, A., Wilm, T. P., Crozatier, M., Pfeffer, P., Wassef, M. and Bally-Cuif, L. (2001). The zebrafish buttonhead-like factor Bts1 is an early regulator of pax2.1 expression during mid-hindbrain development. *Development* **128**, 4021-4034.
- Thisse, B. and Thisse, C. (2004). Fast release clones: a high throughput expression analysis. *ZFIN Direct Data Submission*, ZFIN ID: ZDB-PUB-040907-1.
- Thisse, C. and Thisse, B. (2005). High throughput expression analysis of ZF-Models Consortium clones. *ZFIN Direct Data Submission*. ZFIN ID: ZDB-PUB-051025-1.
- Thisse, B., Pflumio, S., Fürthauer, M., Loppin, B., Heyer, V., Degrave, A., Woehl, R., Lux, A., Steffan, T., Charbonnier, X. Q. et al. (2001). Expression of the zebrafish genome during embryogenesis (NIH R01 RR15402). *ZFIN Direct Data Submission*, ZFIN ID: ZDB-PUB-010810-1.
- Topczewska, J. M., Topczewski, J., Szostak, A., Solnica-Krezel, L. and Hogan, B. L. (2003). Developmentally regulated expression of two members of the Nrarp family in zebrafish. *Gene Expr. Patterns* **3**, 169-171.
- Van Raay, T. J., Coffey, R. J. and Solnica-Krezel, L. (2007). Zebrafish Naked1 and Naked2 antagonize both canonical and non-canonical Wnt signaling. *Dev. Biol.* **309**, 151-168.
- Waxman, J. S., Hocking, A. M., Stoick, C. L. and Moon, R. T. (2004). Zebrafish Dapper1 and Dapper2 play distinct roles in Wnt-mediated developmental processes. *Development* **131**, 5909-5921.
