# Supplementary material for: Evolutionary plasticity of segmentation clock networks
Source: Oxford University Press journal article supplement (doi:10.1242/dev.063834), 2011-06-07
Supplement: dev063834tables7.pdf [file dev063834tables7.pdf]

**Table S7. Genes from the 56 bona fide mouse candidate cyclic gene list present on the chicken and/or zebrafish microarray**

| Mouse Ensembl gene ID | Gene                 | On the mouse and chicken chip | On the mouse and zebrafish chip | On the mouse, chicken and zebrafish chip |
|-----------------------|----------------------|-------------------------------|---------------------------------|------------------------------------------|
| ENSMUSG0000000142     | <i>Axin2</i>         | Yes                           | Yes                             | Yes                                      |
| ENSMUSG00000001440    | <i>Kpnb1</i>         | Yes                           | Yes                             | Yes                                      |
| ENSMUSG00000003031    | <i>Cdkn1b</i>        | No                            | Yes                             | No                                       |
| ENSMUSG00000004446    | <i>Bid</i>           | Yes                           | No                              | No                                       |
| ENSMUSG00000018973    | <i>Hoxb1</i>         | Yes                           | Yes                             | Yes                                      |
| ENSMUSG00000019579    | <i>D17Wsu104e</i>    | Yes                           | Yes                             | Yes                                      |
| ENSMUSG00000020205    | <i>Phlda1</i>        | No                            | No                              | No                                       |
| ENSMUSG00000020644    | <i>Id2</i>           | No                            | Yes                             | No                                       |
| ENSMUSG00000020849    | <i>Ywhae</i>         | Yes                           | Yes                             | Yes                                      |
| ENSMUSG00000022009    | <i>Nufip1</i>        | Yes                           | Yes                             | Yes                                      |
| ENSMUSG00000022114    | <i>Spry2</i>         | Yes                           | Yes                             | Yes                                      |
| ENSMUSG00000022346    | <i>Myc</i>           | Yes                           | Yes                             | Yes                                      |
| ENSMUSG00000022528    | <i>Hes1</i>          | Yes                           | Yes                             | Yes                                      |
| ENSMUSG00000022559    | <i>Fbxl6</i>         | No                            | No                              | No                                       |
| ENSMUSG00000023883    | <i>Phf10</i>         | Yes                           | Yes                             | Yes                                      |
| ENSMUSG00000024571    | <i>Txn14a</i>        | No                            | Yes                             | No                                       |
| ENSMUSG00000024868    | <i>Dkk1</i>          | Yes                           | Yes                             | Yes                                      |
| ENSMUSG00000025060    | <i>Slk</i>           | Yes                           | Yes                             | Yes                                      |
| ENSMUSG00000025271    | <i>Pfkfb1</i>        | No                            | Yes                             | No                                       |
| ENSMUSG00000025612    | <i>Bach1</i>         | Yes                           | No                              | No                                       |
| ENSMUSG00000026000    | <i>Lancl1</i>        | Yes                           | Yes                             | Yes                                      |
| ENSMUSG00000026547    | <i>Tagln2</i>        | No                            | Yes                             | No                                       |
| ENSMUSG00000026615    | <i>Eprs</i>          | Yes                           | Yes                             | Yes                                      |
| ENSMUSG00000026623    | <i>Lpgat1</i>        | Yes                           | Yes                             | Yes                                      |
| ENSMUSG00000026933    | <i>Camsap1</i>       | Yes                           | Yes                             | Yes                                      |
| ENSMUSG00000027381    | <i>Bcl2l11</i>       | No                            | No                              | No                                       |
| ENSMUSG00000027954    | <i>Efna1</i>         | No                            | No                              | No                                       |
| ENSMUSG00000028081    | <i>Rps3a</i>         | No                            | No                              | No                                       |
| ENSMUSG00000028195    | <i>Cyr61</i>         | Yes                           | Yes                             | Yes                                      |
| ENSMUSG00000030447    | <i>Cyfp1</i>         | Yes                           | Yes                             | Yes                                      |
| ENSMUSG00000031865    | <i>Dctn1</i>         | No                            | No                              | No                                       |
| ENSMUSG00000032185    | <i>Carm1</i>         | No                            | No                              | No                                       |
| ENSMUSG00000032340    | <i>Neo1</i>          | Yes                           | Yes                             | Yes                                      |
| ENSMUSG00000032480    | <i>Dhx30</i>         | Yes                           | No                              | No                                       |
| ENSMUSG00000035443    | <i>Thyn1</i>         | Yes                           | Yes                             | Yes                                      |
| ENSMUSG00000037062    | <i>Sh3glb1</i>       | Yes                           | Yes                             | Yes                                      |
| ENSMUSG00000037465    | <i>Klf10</i>         | Yes                           | Yes                             | Yes                                      |
| ENSMUSG00000038418    | <i>Egr1</i>          | Yes                           | Yes                             | Yes                                      |
| ENSMUSG00000039081    | <i>Zfp503</i>        | Yes                           | Yes                             | Yes                                      |
| ENSMUSG00000039910    | <i>Cited2</i>        | Yes                           | No                              | No                                       |
| ENSMUSG00000040289    | <i>Hey1</i>          | Yes                           | Yes                             | Yes                                      |
| ENSMUSG00000041236    | <i>Vps41</i>         | Yes                           | Yes                             | Yes                                      |
| ENSMUSG00000041238    | <i>Rbbp8</i>         | Yes                           | Yes                             | Yes                                      |
| ENSMUSG00000042363    | <i>1110067D22Rik</i> | Yes                           | No                              | No                                       |
| ENSMUSG00000042745    | <i>Id1</i>           | Yes                           | Yes                             | Yes                                      |
| ENSMUSG00000044461    | <i>Shisa2</i>        | Yes                           | Yes                             | Yes                                      |
| ENSMUSG00000044548    | <i>Dact1</i>         | Yes                           | No                              | No                                       |
| ENSMUSG00000047554    | <i>Tmem41b</i>       | Yes                           | Yes                             | Yes                                      |
| ENSMUSG00000048001    | <i>Hes5</i>          | Yes                           | Yes                             | Yes                                      |
| ENSMUSG00000053560    | <i>Ier2</i>          | No                            | Yes                             | No                                       |
| ENSMUSG00000053754    | <i>Chd8</i>          | No                            | No                              | No                                       |
| ENSMUSG00000060548    | <i>Tnfrsf19</i>      | Yes                           | Yes                             | Yes                                      |
| ENSMUSG00000061313    | <i>Ddhd2</i>         | Yes                           | No                              | No                                       |
| ENSMUSG00000063870    | <i>Chd4</i>          | Yes                           | Yes                             | Yes                                      |
| ENSMUSG00000075304    | <i>Sp5</i>           | No                            | Yes                             | No                                       |
| ENSMUSG00000076431    | <i>Sox4</i>          | Yes                           | Yes                             | Yes                                      |
